# Supplementary material for: Identification of a Novel Gene Signature of ES Cells Self-Renewal Fluctuation through System-Wide Analysis
Source: PubMed Central journal article supplement (PMC3879232; doi:10.1371/journal.pone.0083235), 2014-01-02
Supplement: pone.0083235.s003.pdf [file pone.0083235.s003.pdf]

| UCSC identifier | MGS rank | Gene symbol   | Cluster ID |
|-----------------|----------|---------------|------------|
| uc008tom.1      | 1        | zfp352        | no cluster |
| uc009qag.1      | 2        | Spesp1        | no cluster |
| uc009fqf.1      | 3        | Tex101        | 1          |
| uc009fqg.1      | 4        | Tex101        | 1          |
| uc009fqh.1      | 5        | Tex101        | 1          |
| uc009fqi.1      | 6        | Tex101        | 1          |
| uc012ffo.1      | 7        | Tex101        | 1          |
| uc009sjq.2      | 8        | gm16367       | 2          |
| uc009sjs.2      | 9        | gm16367       | 2          |
| uc012ehp.1      | 10       | gm16367       | 2          |
| uc012ehq.1      | 11       | gm16367       | 2          |
| uc012hdp.1      | 12       | gm16367       | 2          |
| uc012hdq.1      | 13       | gm16367       | 2          |
| uc012hdr.1      | 14       | gm16367       | 2          |
| uc009iwz.2      | 15       | Dub1          | no cluster |
| uc008tio.1      | 16       | gm13871       | 3          |
| uc008tiu.1      | 17       | gm13871       | 3          |
| uc008tiz.2      | 18       | gm13871       | 3          |
| uc008tja.2      | 19       | gm13871       | 3          |
| uc008tjb.2      | 20       | gm13871       | 3          |
| uc008tjc.2      | 21       | gm13871       | 3          |
| uc008tjd.2      | 22       | gm13871       | 3          |
| uc008tje.2      | 23       | gm13871       | 3          |
| uc012dgg.1      | 24       | gm13871       | 3          |
| uc012hgh.1      | 25       | A2ANE6        | no cluster |
| uc009dpn.1      | 26       | Dppa3         | no cluster |
| uc012hgg.1      | 27       | Rhox3g        | no cluster |
| uc007fcv.2      | 28       | Dux4          | no cluster |
| uc007fcw.1      | 29       | EG245263      | no cluster |
| uc009tfj.2      | 30       | 1700013H16Rik | no cluster |
| uc008koa.1      | 31       | Pramel7       | no cluster |
| uc012clt.1      | 32       | Sycp2         | 4          |
| uc008ohn.1      | 33       | Sycp2         | 4          |
| uc009fgn.1      | 34       | Crxos1        | 5          |
| uc009fgo.2      | 35       | Crxos1        | 5          |
| uc012ezy.1      | 36       | Crxos1        | 5          |
| uc012ezz.1      | 37       | Crxos1        | 5          |
| uc011wiu.1      | 38       | Gm4850        | no cluster |
| uc009gac.1      | 39       | Lgals6        | 6          |
| uc009gad.1      | 40       | Lgals6        | 6          |
| uc011ypq.1      | 41       | Gm1995        | no cluster |
| uc011ypt.1      | 42       | Gm7104        | no cluster |
| uc008vqh.2      | 43       | gm13057       | 7          |
| uc008vqi.1      | 44       | gm13057       | 7          |
| uc012dol.1      | 45       | gm13057       | 7          |
| uc012dom.1      | 46       | gm13057       | 7          |
| uc012don.1      | 47       | gm13057       | 7          |
| uc012dor.1      | 48       | gm13057       | 7          |
| uc008kob.1      | 49       | Pramel6       | no cluster |
| uc009nkt.1      | 50       | AK076897      | no cluster |
| uc009nks.1      | 51       | Hydin         | no cluster |

| UCSC identifier | MGS rank | Gene symbol   | Cluster ID |
|-----------------|----------|---------------|------------|
| uc008wmo.2      | 52       | Speer4d       | no cluster |
| uc008wmr.1      | 53       | Speer4d       | 8          |
| uc012dsk.1      | 54       | Speer4d       | 8          |
| uc008wmn.1      | 55       | Speer4d       | 8          |
| uc007zjn.1      | 56       | Dppa2         | no cluster |
| uc007ljr.1      | 57       | AK009035      | 9          |
| uc007ljs.1      | 58       | BC119473      | 9          |
| uc007ljq.2      | 59       | B1AQB2        | no cluster |
| uc007ljp.2      | 60       | Krtap4-13     | no cluster |
| uc009hby.1      | 61       | Nell1         | no cluster |
| uc007lba.1      | 62       | Gip           | no cluster |
| uc009shv.2      | 63       | tcstv1        | no cluster |
| uc008unr.1      | 64       | Rims3         | 10         |
| uc008uns.1      | 65       | Rims3         | 10         |
| uc007nzw.1      | 66       | Vti1b         | 11         |
| uc007nzx.2      | 67       | Vti1b         | 11         |
| uc007nzy.2      | 68       | Vti1b         | 11         |
| uc007nzv.2      | 69       | Arg2          | no cluster |
| uc007grv.2      | 70       | NM_011461     | no cluster |
| uc011xli.1      | 71       | Spic          | no cluster |
| uc009itr.1      | 72       | Dub2          | 12         |
| uc009vep.1      | 73       | Dub2          | 12         |
| uc009itk.1      | 74       | Dub2          | 12         |
| uc009szz.2      | 75       | Fam70a        | 13         |
| uc009szs.2      | 76       | Fam70a        | 13         |
| uc008dtd.2      | 77       | 1110020A21Rik | 14         |
| uc012ayc.1      | 78       | 1110020A21Rik | 14         |
| uc012ayd.1      | 79       | Pppm1b        | no cluster |
| uc007hjr.1      | 80       | Stac3         | 15         |
| uc007hjs.1      | 81       | Stac3         | 15         |
| uc008rxe.1      | 82       | Fam110b       | 16         |
| uc008rxf.1      | 83       | Fam110b       | 16         |
| uc008rxg.1      | 84       | Fam110b       | 16         |
| uc009dui.1      | 85       | Tuba3a        | 17         |
| uc009erq.1      | 86       | Tuba3a        | 17         |
| uc009dug.1      | 87       | 4930417O13Rik | no cluster |
| uc008tjm.1      | 88       | Ptprd         | 18         |
| uc008tjo.1      | 89       | Ptprd         | 18         |
| uc008tjp.1      | 90       | Ptprd         | 18         |
| uc008xkd.2      | 91       | Ppargc1a      | 19         |
| uc008xkc.2      | 92       | Ppargc1a      | 19         |
| uc007npv.2      | 93       | Clec14a       | no cluster |
| uc007nxo.1      | 94       | Syne2         | 20         |
| uc007npx.1      | 95       | Syne2         | 20         |
| uc007qnj.1      | 96       | Ror2          | no cluster |
| uc007odj.1      | 97       | Rbm25         | 21         |
| uc007odm.2      | 98       | Rbm25         | 21         |
| uc007uul.1      | 99       | Pcdh9         | 22         |
| uc011zpc.1      | 100      | Pcdh9         | 22         |
